# Supplementary material for: Characteristics of Central American brocket deer resting sites in a tropical mountain cloud forest in eastern Mexico
Source: PeerJ. 2022 Jan 3;10:e12587. doi: 10.7717/peerj.12587 (PMC8734461; doi:10.7717/peerj.12587)
Supplement: Supplemental Information 1 — Characteristics of the resting sites (e.g., canopy coverage, slope orientation, herbaceous cover). [file peerj-10-12587-s001.xlsx]

## Sheet: base
Treatment	Resting site	canopy	Understory_density	Understory_height	Concealment_cover_for_fawns	Concealment_cover_for_adults	escape_routes	slope_from_the_ground	scrapes	tree	edible_plant_species	water	biotope	Elevation	aspect	slope
1	1	97.92	0.875	1.2	100	82.2222	4	185	1	230	1.19	15	beech	1884	141.34	3.05531
1	2	93.76	0.6	0.74375	100	64.4444	2	174	0	230	0.07	2	beech	1838	197.003	27.806
1	3	95.2	0.7	1.1	100	83	4	175	0	0	0.51	3	beech	1899	294.146	7.54544
1	4	98.96	0.9	1.76889	100	88.8889	4	150	1	0	1.5	20	oak	1903	351.87	5.0527
1	5	100	0.5	0.925	100	53.3333	4	189	1	65	0.77	20	oak	1728	327.45	24.9288
1	6	100	0.4	0.61875	100	37.7778	4	180	0	0	0.77	50	beech	1901	59.7436	6.60577
1	7	97	0.8	1.2	100	75	4	179	0	0	0.89	50	beech	1870	37.9987	18.7011
1	10	95	0.9	0.9	100	77	4	145	0	0	1.02	50	oak	1888	123.69	6.85531
1	11	96.88	0.475	0.855263	75	48.8889	4	145	0	0	1.16	50	oak	1889	93.8141	3.58535
1	12	100	0.575	1.44783	100	86.6667	5	180	1	127	1.18	6	secondary	1889	324.462	6.13925
1	13	99	0.7	0.85	100	83	4	177	1	123	0.77	15	rainforest	1844	54.4623	12.1407
1	14	97.92	0.675	1.24074	100	84.4444	4	180	1	99	0.87	10	rainforest	1849	55.3889	19.7764
1	15	97.92	0.675	1.24074	100	84.4444	4	180	1	99	0.87	30	rainforest	1851	51.789	13.9991
1	16	100	0.275	1.26364	100	75.5556	3	170	0	210	0	15	rainforest	1854	46.4321	13.2706
1	17	98.96	0.775	1.3129	100	71.1111	4	180	0	161.5	0.69	15	oak-pine	1861	42.1376	6.73174
1	18	100	0.375	1.17	100	73.3333	4	160	0	160	0.09	60	oak	1524	253.695	32.5527
1	19	94.8	0.9	0.945556	100	77.7778	3	180	0	0	0	60	secondary	1553	219.806	18.0315
1	20	97.92	0.65	0.975	100	68.8889	4	170	1	120	0.17	20	beech	1545	227.161	17.3605
1	21	100	0.57	0.99	100	68	3	179	1	0	1.3	15	beech	1851	268.363	8.303
1	22	99	0.7	1.12	100	70	3	180	0	0	1.1	8.4	oak	1913	337.932	9.44774
1	25	98.96	0.45	0.551111	100	80	6	174	0	180	0	50	oak	1917	81.2538	6.25701
1	26	100	0	0	100	71.1111	5	143	0	200	0	1	beech	1901	257.471	12.9832
1	27	98.96	0.275	1.41182	100	55.5556	3	161	1	170	0.12	7	oak	1887	173.089	15.4879
1		100	0.4	0.95	100	71.2	4	168	1	150	0.98	60	beech	1876	182.643	15.1739
1	28	97.92	0.3	1.03333	100	80	6	170	0	0	0	30	oak	1877	236.514	17.9955
1	29	98	0.3	1.3	100	63.5	3	171	0	0		9	oak	1807	6.46982	22.1405
1	30	100	0.275	0.936364	100	62.2222	4	145	0	0	0.49	15	beech	1822	1.4688	9.23566
1	31	100	0.4	1.1	100	81.3	4	144	0	0	2.1	30	beech	1848	164.745	2.72076
1	32	99	0.6	0.87	100	87.5	5	146	1	0	2.1	1	beech	1921	338.199	17.4443
1	33	94.8	0.45	0.826667	100	80	5	150	0	70	0.83	60	oak-pine	1901	336.125	15.5379
1	36	100	0.75	0.93125	100	42.2222	5	175	0	110	1.89	60	oak-pine	1855	7.12502	11.3991
1	42	97	0.71	0.95	100	60.2	5	177	0	70	1.15	50	beech	1917	71.565	11.1833
1	43	97	0.38	0.87	100	87.1	4	178	0	170	1.2	50	oak-pine	1814	270.36	33.5331
1	44	97.92	0.425	1.23529	100	77.7778	5	178	0	0	0	50	oak-pine	1977	159.775	4.82402
1	45	92.72	0.65	1.125	100	40	3	180	1	150	1.42	50	secondary	1835	270.352	34.1917
1	54	98.96	0	0.8	100	53.3333	7	179	1	250	1.04	52	ravines	1835	311.222	32.0533
1	55	96.88	0.35	0.495714	100	64.4444	4	170	0	300	1.36	30	ravines	1854	182.827	34.0599
1	56	100	0.7	0.434286	100	73.3333	4	180	0	90	1.8	60	secondary	1897	320.194	14.5968
1	57	100	0.4	1.205	100	77.7778	4	170	1	120	0.31	50	oak	1861	7.43141	16.1735
1	58	100	0	1.205	100	77.7778	4	180	1	130	1.7	45	beech	1851	51.789	13.9991
1	60	98	0.3	1.1	100	78.1	6	180	0	0	1.5	45	beech	1872	150.255	3.84485
1	61	100	0.27	1.3	100	79.3	3	178	0	0	1.48	45	beech	1870	330.524	6.28386
1	59	95.84	0	1.205	100	68.8889	4	180	0	130	1.03	45	beech	1862	336.801	3.63251
0	1	62.46	0.52	0.01	70	77	3	40	0	0	1.37	100	pine	1864	324.09	14.92
0	2	62.46	0.52	0.31	70	77	3	40	0	110	1.37	100	pine	1864	324.09	14.92
0	4	70.6	0.12	0.24	0	0	0	30	0	0	0	150	houses	2009	149.32	35.05
0	5	57.43	0.48	0.12	100	100	3	42	0	0	0	140	oak	1940	399.14	56.19
0	6	57.43	0.48	0.12	100	100	3	42	0	115	0	114	oak	1955	334.5	49.4
0	7	57.43	0.48	0.12	100	100	3	42	0	0	0	115	oak	1955	334.5	49.4
0	8	69.7	0.44	0.38	100	67	4	35	0	0	0.55	150	pine	1887	341.56	35.58
0	9	71.76	0.56	0.4	20	30	3	40	0	0	0.44	150	pine	1919	210.53	18.87
0	10	62.46	0.52	0.31	70	77	3	40	0	0	0.93	160	pine	1870	49.23	15.95
0	11	70.5	0.48	0.9	60	34	3	40	0	80	0.17	100	pine	1889	174.8	3.95
0	12	73.89	0.56	0.83	100	80	2	35	0	0	0.15	100	pine	1891	94.4	10.44
0	13	73.89	0.56	0.83	100	80	2	35	0	0	0.15	150	pine	1891	94.4	10.44
0	14	73.89	0.56	0.83	100	80	2	35	0	150	0.15	130	pine	1891	94.4	10.44
0	15	73.89	0.56	0.83	100	80	2	35	0	0	0.15	113	pine	1891	94.4	10.44
0	16	78.22	0.24	0.29	100	84	4	30	0	0	1.01	115	road	1811	159.9	19.76
0	17	74.02	0.64	0.4	100	57	3	30	0	0	1.37	118	pine	1848	136.93	52.48
0	18	74.02	0.64	0.4	100	57	3	30	0	0	1.53	100	pine	1848	140.04	20.12
0	19	78.22	0.24	0.29	100	84	4	30	0	300	1.01	120	road	1811	159.9	19.76
0	20	74.02	0.64	0.4	100	57	3	30	0	0	1.37	145	pine	1848	136.93	52.48
0	21	74.28	0.56	0.44	60	47	0	35	0	0	1.6	140	pine	1852	73.61	22.15
0	22	74.28	0.56	0.44	60	47	0	35	0	0	1.6	150	pine	1852	73.61	22.15
0	23	62.2	0.6	0.53	0	0	1	40	0	70	0.68	139	pine	1832	90	26.67
0	24	62.2	0.6	0.53	0	0	1	40	0	0	1.6	154	pine	1843	90	26.67
0	25	63.5	0.64	0.3	100	27	0	35	0	0	0	150	oak	1890	17.78	19.81
0	26	63.5	0.64	0.3	100	27	0	35	0	0	0	130	secondary	1850	302.56	41.04
0	27	71.76	0.56	0.4	20	30	3	40	0	0	0.44	120	pine	1919	210.53	18.87
0	28	65.78	0.6	0.23	80	60	4	40	0	200	0.44	160	oak	1903	284.93	12.94
0	29	65.78	0.6	0.23	80	60	4	40	0	0	0.44	100	oak	1903	284.93	12.94
0	30	60.97	0.6	0.38	70	40	4	39	0	0	1.09	150	pine	1868	343.6	7.38
0	31	62.46	0.52	0.31	70	77	3	40	0	0	0.93	100	pine	1870	35.53	17.92
0	32	62.46	0.52	0.31	70	77	3	40	0	0	0.93	300	pine	1870	35.53	17.92
0	33	82.13	0.72	0.36	100	70	1	30	0	0	1.36	200	secondary	1871	166.13	33.05
0	34	78.22	0.24	0.29	100	84	4	30	0	0	1.01	100	road	1811	159.9	19.76
0	35	78.22	0.24	0.29	100	84	4	30	0	0	1.01	100	road	1811	159.9	19.76
0	36	74.02	0.64	0.4	100	57	3	30	0	0	1.53	15	pine	1848	140.04	20.12
0	39	72.05	0.48	0.62	100	80	1	36	0	0	1.37	65	pine	1838	133.36	82.55
0	41	74.02	0.64	0.4	100	57	3	30	0	180	1.53	75	pine	1848	140.04	20.12
0	42	57.43	0.48	0.12	100	100	3	42	0	0	0	80	oak	1998	354.14	32.68
0	43	57.43	0.48	0.12	100	100	3	42	0	0	0	100	oak	1977	349.99	50.36
0	44	57.43	0.48	0.12	100	100	3	42	0	0	0	150	oak	1977	349.99	50.36
0	6	57.43	0.48	0.12	100	100	3	42	0	115	0.7	300	oak	1955	334.5	49.4
0	31	62.46	0.52	0.31	70	77	3	40	0	0	0.66	200	pine	1870	35.53	17.92
0	12	73.89	0.56	0.83	100	80	2	35	0	0	0	100	pine	1891	94.4	10.44
